# Supplementary material
Source: Springer Nature journal article supplement (https://www.springermedizin.de/resource/supplementary/12933_2011_413_MOESM3_ESM.pdf/9538126)

**CD34/45<sup>+</sup> BM-CPCs (1x10<sup>6</sup> WBCs)**

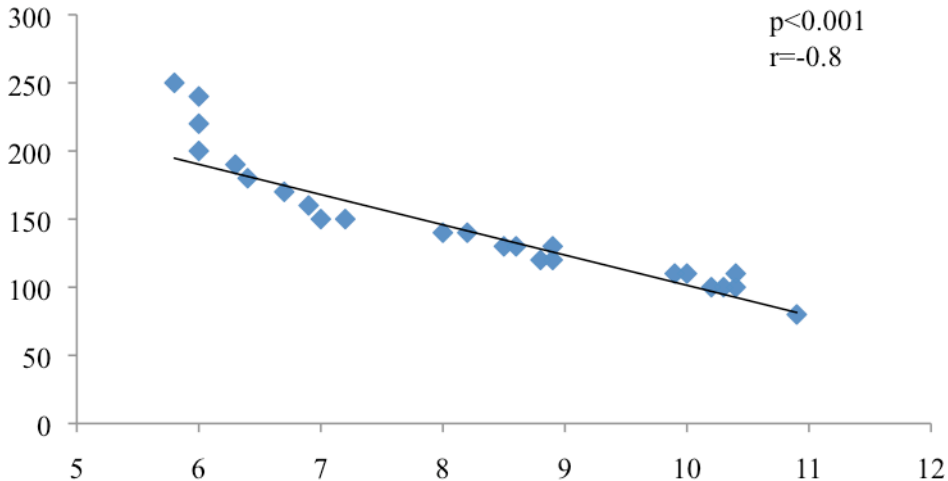

**HbA1c %**

Supplement: MOESM3 [file 9538126]
